# Supplementary material
Source: publisher figshare collection journal article supplement (https://acs.figshare.com/ndownloader/files/14945315)
Supplement: Supplementary file 1 [file 14945315]

## Sheet: Sheet1
Table S1 Classification of each enriched OTU in low pH, medium pH and high pH amended with 13C,15N-urea compared to 12C,14N-urea control
13C, 15N-urea
Low pH		Medium pH		High pH
ID	Classification	ID	Classification	ID	Classification
denovo542153	Candidatus Solibacter	denovo330445	Afifella	denovo517777	Anaerolinea
denovo516254	Candidatus Solibacter	denovo545871	Anaeromyxobacter	denovo440071	Anaerolinea
denovo500440	Candidatus Solibacter	denovo467274	Anaeromyxobacter	denovo86760	Anaeromyxobacter
denovo491295	Candidatus Solibacter	denovo405083	Anaeromyxobacter	denovo407899	Anaeromyxobacter
denovo48025	Candidatus Solibacter	denovo3919	Anaeromyxobacter	denovo390235	Anaeromyxobacter
denovo403270	Candidatus Solibacter	denovo389457	Anaeromyxobacter	denovo258251	Anaeromyxobacter
denovo37547	Candidatus Solibacter	denovo383076	Anaeromyxobacter	denovo146453	Anaeromyxobacter
denovo352404	Candidatus Solibacter	denovo356495	Anaeromyxobacter	denovo105082	Anaeromyxobacter
denovo343237	Candidatus Solibacter	denovo320643	Anaeromyxobacter	denovo48025	Candidatus Solibacter
denovo316547	Candidatus Solibacter	denovo27523	Anaeromyxobacter	denovo109620	Candidatus Solibacter
denovo298994	Candidatus Solibacter	denovo144574	Anaeromyxobacter	denovo75352	Desulfobacca
denovo280588	Candidatus Solibacter	denovo70298	Candidatus Solibacter	denovo543300	Desulfobacca
denovo248637	Candidatus Solibacter	denovo48025	Candidatus Solibacter	denovo383075	Desulfobacca
denovo233924	Candidatus Solibacter	denovo464805	Candidatus Solibacter	denovo35193	Desulfobacca
denovo223842	Candidatus Solibacter	denovo403270	Candidatus Solibacter	denovo169044	Desulfobacca
denovo223749	Candidatus Solibacter	denovo357785	Candidatus Solibacter	denovo304105	Flavihumibacter
denovo130525	Candidatus Solibacter	denovo347852	Candidatus Solibacter	denovo124119	Flavihumibacter
denovo12682	Candidatus Solibacter	denovo320619	Candidatus Solibacter	denovo409360	Flavisolibacter
denovo114877	Candidatus Solibacter	denovo150338	Candidatus Solibacter	denovo58803	Geobacter
denovo109620	Candidatus Solibacter	denovo12682	Candidatus Solibacter	denovo58244	Geobacter
denovo85751	Geobacter	denovo111126	Candidatus Solibacter	denovo489239	Geobacter
denovo72450	Geobacter	denovo541280	Coprococcus	denovo477124	Geobacter
denovo58803	Geobacter	denovo217111	Coprococcus	denovo467849	Geobacter
denovo531556	Geobacter	denovo174917	Coprococcus	denovo433758	Geobacter
denovo489928	Geobacter	denovo172298	Coprococcus	denovo405667	Geobacter
denovo489239	Geobacter	denovo144763	Coprococcus	denovo363656	Geobacter
denovo477124	Geobacter	denovo110619	Coprococcus	denovo298602	Geobacter
denovo467849	Geobacter	denovo59737	Desulfobacca	denovo28316	Geobacter
denovo456388	Geobacter	denovo383075	Desulfobacca	denovo257657	Geobacter
denovo446327	Geobacter	denovo223264	Desulfobacca	denovo257049	Geobacter
denovo435314	Geobacter	denovo186677	Desulfobacca	denovo230934	Geobacter
denovo405667	Geobacter	denovo531556	Geobacter	denovo193055	Geobacter
denovo363656	Geobacter	denovo471183	Geobacter	denovo162779	Geobacter
denovo353825	Geobacter	denovo458381	Geobacter	denovo97870	GOUTA19
denovo308417	Geobacter	denovo446327	Geobacter	denovo468697	GOUTA19
denovo298602	Geobacter	denovo435314	Geobacter	denovo43516	GOUTA19
denovo287321	Geobacter	denovo413384	Geobacter	denovo42237	GOUTA19
denovo28316	Geobacter	denovo353825	Geobacter	denovo324119	GOUTA19
denovo257657	Geobacter	denovo339914	Geobacter	denovo215712	GOUTA19
denovo257049	Geobacter	denovo33216	Geobacter	denovo70718	Leptolyngbya
denovo255160	Geobacter	denovo308417	Geobacter	denovo485226	Leptolyngbya
denovo230934	Geobacter	denovo298602	Geobacter	denovo448971	Leptolyngbya
denovo228448	Geobacter	denovo28316	Geobacter	denovo335805	Leptolyngbya
denovo225052	Geobacter	denovo257657	Geobacter	denovo330275	Leptolyngbya
denovo191746	Geobacter	denovo230934	Geobacter	denovo271708	Leptolyngbya
denovo190251	Geobacter	denovo179642	Geobacter	denovo232966	Leptolyngbya
denovo179642	Geobacter	denovo50296	GOUTA19	denovo178627	Leptolyngbya
denovo151517	Geobacter	denovo48157	GOUTA19	denovo133553	Leptolyngbya
denovo50296	GOUTA19	denovo479973	GOUTA19	denovo127995	Leptolyngbya
denovo48157	GOUTA19	denovo468697	GOUTA19	denovo126482	Leptolyngbya
denovo43516	GOUTA19	denovo43516	GOUTA19	denovo11153	Leptolyngbya
denovo37584	GOUTA19	denovo324119	GOUTA19	denovo478318	Nannocystis
denovo371923	GOUTA19	denovo296252	GOUTA19	denovo187191	Nannocystis
denovo324119	GOUTA19	denovo284561	GOUTA19	denovo546495	Nitrosophaeraceae(f)
denovo296252	GOUTA19	denovo273234	GOUTA19	denovo441746	Nitrosophaeraceae(f)
denovo284561	GOUTA19	denovo269913	GOUTA19	denovo429487	Nitrosophaeraceae(f)
denovo269017	GOUTA19	denovo70718	Leptolyngbya	denovo412092	Nitrosophaeraceae(f)
denovo243578	GOUTA19	denovo485226	Leptolyngbya	denovo167475	Nitrosophaeraceae(f)
denovo215712	GOUTA19	denovo381891	Leptolyngbya	denovo104320	Nitrosophaeraceae(f)
denovo142628	GOUTA19	denovo358804	Leptolyngbya	denovo514358	Paenibacillus
denovo345509	Leptolyngbya	denovo337954	Leptolyngbya	denovo396040	Paenibacillus
denovo266672	Leptolyngbya	denovo335805	Leptolyngbya	denovo3886	Paenibacillus
denovo11153	Leptolyngbya	denovo301724	Leptolyngbya	denovo263696	Paenibacillus
denovo59626	Nostoc	denovo266755	Leptolyngbya	denovo124745	Paenibacillus
denovo327173	Nostoc	denovo85420	Nitrosophaeraceae(f)	denovo53647	Propionivibrio
denovo262846	Nostoc	denovo83817	Nitrosophaeraceae(f)	denovo463357	Propionivibrio
denovo361822	SAGMA-X	denovo56042	Nitrosophaeraceae(f)	denovo326551	Propionivibrio
denovo356493	SAGMA-X	denovo546495	Nitrosophaeraceae(f)	denovo241127	Propionivibrio
denovo120600	SAGMA-X	denovo541078	Nitrosophaeraceae(f)	denovo340706	Pseudomonas
		denovo493182	Nitrosophaeraceae(f)	denovo276628	Pseudomonas
		denovo479102	Nitrosophaeraceae(f)	denovo8383	Steroidobacter
		denovo4745	Nitrosophaeraceae(f)	denovo463952	Steroidobacter
		denovo472957	Nitrosophaeraceae(f)	denovo135822	Steroidobacter
		denovo456448	Nitrosophaeraceae(f)	denovo496753	Syntrophobacter
		denovo450626	Nitrosophaeraceae(f)
		denovo444501	Nitrosophaeraceae(f)
		denovo444278	Nitrosophaeraceae(f)
		denovo441746	Nitrosophaeraceae(f)
		denovo419570	Nitrosophaeraceae(f)
		denovo412092	Nitrosophaeraceae(f)
		denovo394102	Nitrosophaeraceae(f)
		denovo379679	Nitrosophaeraceae(f)
		denovo344970	Nitrosophaeraceae(f)
		denovo331776	Nitrosophaeraceae(f)
		denovo32732	Nitrosophaeraceae(f)
		denovo322019	Nitrosophaeraceae(f)
		denovo316046	Nitrosophaeraceae(f)
		denovo278370	Nitrosophaeraceae(f)
		denovo252935	Nitrosophaeraceae(f)
		denovo2213	Nitrosophaeraceae(f)
		denovo219123	Nitrosophaeraceae(f)
		denovo214871	Nitrosophaeraceae(f)
		denovo203265	Nitrosophaeraceae(f)
		denovo199443	Nitrosophaeraceae(f)
		denovo167475	Nitrosophaeraceae(f)
		denovo159073	Nitrosophaeraceae(f)
		denovo142798	Nitrosophaeraceae(f)
		denovo127712	Nitrosophaeraceae(f)
		denovo125644	Nitrosophaeraceae(f)
		denovo104320	Nitrosophaeraceae(f)
		denovo504922	Pseudomonas
		denovo340706	Pseudomonas
		denovo276628	Pseudomonas
		denovo426634	Ramlibacter
		denovo481199	Rhodoplanes
		denovo455684	Rhodoplanes
		denovo36046	Rhodoplanes
		denovo300772	Rhodoplanes
		denovo184386	Rhodoplanes
		denovo125754	Rhodoplanes
		denovo93342	Thiobacillus
		denovo469499	Thiobacillus
		denovo296625	Thiobacillus
		denovo25355	Thiobacillus
		denovo217362	Thiobacillus
		denovo17459	Thiobacillus
		denovo11769	Thiobacillus
		denovo108371	Thiobacillus
Purple: OTUs enriched in most (80%) of soils examined in this study;
Green: OTUs enriched in soils with low pH and medium pH;
Red: OTUs enriched in soils with medium pH and high pH;
Blue: OTUs enriched in soils with low pH and high pH.
